# Supplementary material for: Hierarchical structures of hematopoietic stem cells and their bone marrow niches are measured via immune privilege
Source: Research Square preprint supplement (doi:10.21203/rs.3.rs-2469338/v1), 2023-01-27
Supplement: Supplementary file 1 [file Video Legends 4-11.pdf › Supplementary Videos 4-11/Video Legends 4-11.pdf]

**Supplementary Video 4: Movie showing a scan through a z-stack image of NO<sup>Hi</sup>CD150<sup>+</sup> HSCs (yellow) localized at CD200<sup>Hi</sup> capillaries (magenta) at the endosteal surface of the metaphysis.** Red: Alexa 568-CD150. Green: DAF-FM. Grey: BV421-Lin/CD48. Cyan: FITC-EMCN. Magenta: Q655-CD200. The scale bar indicates 20  $\mu$ m.

**Supplementary Video 5: Movie showing a scan through a z-stack image of NO<sup>Hi</sup>CD150<sup>+</sup> HSCs (yellow) localized at CD200<sup>Hi</sup> capillaries (magenta) at the endosteal surface in the diaphysis.** CD200<sup>Hi</sup> capillaries (magenta) transit to diaphysis sinusoids (blue). Red: Alexa 568-CD150. Green: DAF-FM. Grey: BV421-Lin/CD48. Blue: Alexa 648-IB4. Magenta: Q655-CD200. The scale bar indicates 20  $\mu$ m.

**Supplementary Video 6: Movie showing a scan through a z-stack image of NO<sup>Low</sup>CD150<sup>+</sup> HSCs (red) localizing at Type H vessels (cyan) in the metaphysis.** Red: Alexa 568-CD150. Green: FITC-DAF-FM. Grey: BV421-Lin/CD48. Blue: Alexa 648-IB4. Magenta: Q655-CD200. The scale bar indicates 20  $\mu$ m.

**Supplementary Video 7: Movie showing a scan through a z-stack image of NO<sup>Low</sup>CD150<sup>+</sup> HSCs (red) localized at sinusoids (blue) in the metaphysis.** Red: Alexa 568-CD150. Green: FITC-DAF-FM. Grey: BV421-Lin/CD48. Blue: Alexa 648-IB4. Magenta: Q655-CD200. The scale bar indicates 20  $\mu$ m.

**Supplementary Video 8: Movie showing a scan through a z-stack image of NO<sup>Hi</sup>TdTomato<sup>+</sup> HSCs (yellow) at CD200<sup>Hi</sup> capillaries (magenta) at the metaphysis endosteum in tamoxifen-treated *Pdzk1ip<sup>creER</sup> × ROSA26TdTomato* mice.** Red: Alexa 568-CD150. Green: FITC-DAF-FM. Grey: BV421-Lin/CD48. Cyan: FITC-EMCN. Blue: Alexa 648-IB4. Magenta: Q655-CD200. The scale bar indicates 20  $\mu$ m.

**Supplementary Video 9: Movie showing a scan through a z-stack image of NO<sup>Hi</sup>TdTomato<sup>+</sup> HSCs (yellow) at CD200<sup>Hi</sup> capillaries (magenta) at the diaphysis endosteum in tamoxifen-treated *Pdzk1ip<sup>creER</sup> × ROSA26TdTomato* mice.** Red: Alexa 568-CD150. Green: FITC-DAF-

FM. Grey: BV421-Lin/CD48. Blue: Alexa 648-IB4. Magenta: Q655-CD200. The scale bar indicates 20  $\mu\text{m}$ .

**Supplementary Video 10: Movie showing a scan through a z-stack image of NO<sup>Low</sup> HSCs (red) at Type H vessels (cyan) in the metaphysis.**

Red: Alexa 568-CD150. Green: FITC-DAF-FM. Grey: BV421-Lin/CD48. Cyan: FITC-EMCN. Blue: Alexa 648-IB4. Magenta: Q655-CD200. The scale bar indicates 20  $\mu\text{m}$ .

**Supplementary Video 11: Movie showing a scan through a z-stack image of NO<sup>Low</sup> HSCs (red) at sinusoids (blue) in the central marrow of the diaphysis.**

Red: Alexa 568-CD150. Green: FITC-DAF-FM. Grey: BV421-Lin/CD48. Cyan: FITC-EMCN. Blue: Alexa 648-IB4. Magenta: Q655-CD200. The scale bar indicates 20  $\mu\text{m}$ .
