# Supplementary material for: Hierarchical structures of hematopoietic stem cells and their bone marrow niches are measured via immune privilege
Source: Research Square preprint supplement (doi:10.21203/rs.3.rs-2469338/v1), 2023-01-27
Supplement: Supplementary file 2 [file Video Legend 3.pdf › Supplementary Video 3 for Mac/Video Legend 3.pdf]

**Supplementary Video 3: 3D reconstruction movie demonstrating the spatial distribution of CD200<sup>Hi</sup> capillary beds (magenta) with respect to Type H vessels (cyan) and arterioles (red) at the metaphysis region.** Green: Alexa 568-IB4. Magenta: Q655-CD200. Cyan: FITC-EMCN. Red: Cy3-Sca1. The scale bar indicates 20  $\mu\text{m}$ .
