# Supplementary material for: Hierarchical structures of hematopoietic stem cells and their bone marrow niches are measured via immune privilege
Source: Research Square preprint supplement (doi:10.21203/rs.3.rs-2469338/v1), 2023-01-27
Supplement: Supplementary file 3 [file Video Legends 1-2.pdf › Supplementary Videos 1 and 2/Video Legends 1-2.pdf]

**Supplementary Video 1: Movie showing a scan through a z-stack image that demonstrates the vascular network in the metaphysis region.** CD200<sup>Hi</sup> capillaries (magenta) create capillary beds surrounding the transitional regions from arterioles (red) into Type H vessels (cyan) near the epiphyseal line. Magenta: Q655-CD200. Cyan: FITC-EMCN. Red: Cy3-Sca1. Green: Alexa 568-IB4. The scale bar indicates 20  $\mu\text{m}$ .

**Supplementary Video 2: Movie showing a scan through a z-stack image which demonstrate CD200<sup>Hi</sup> capillary beds at the metaphysis region.** CD200<sup>Hi</sup> capillaries (magenta) create capillary beds surrounding the transitional regions from arterioles (red) into Type H vessels (cyan) near the epiphyseal line. Green: Alexa 568-IB4. Magenta: Q655-CD200. Cyan: FITC-EMCN. Red: Cy3-Sca1. The scale bar indicates 20  $\mu\text{m}$ .
